## Correction

# Correction: *KIR* Gene Content in Amerindians Indicates Influence of Demographic Factors

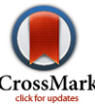

**The PLOS ONE Staff**

There are errors in Figure 1. The columns containing frequencies at the bottom of Figure 1A are in the wrong order. The authors have provided a corrected version here.

**Citation:** The PLOS ONE Staff (2014) Correction: *KIR* Gene Content in Amerindians Indicates Influence of Demographic Factors. PLoS ONE 9(5): e98427. doi:10.1371/journal.pone.0098427

**Published:** May 16, 2014

**Copyright:** © 2014 The PLOS ONE Staff. This is an open-access article distributed under the terms of the Creative Commons Attribution License, which permits unrestricted use, distribution, and reproduction in any medium, provided the original author and source are credited.

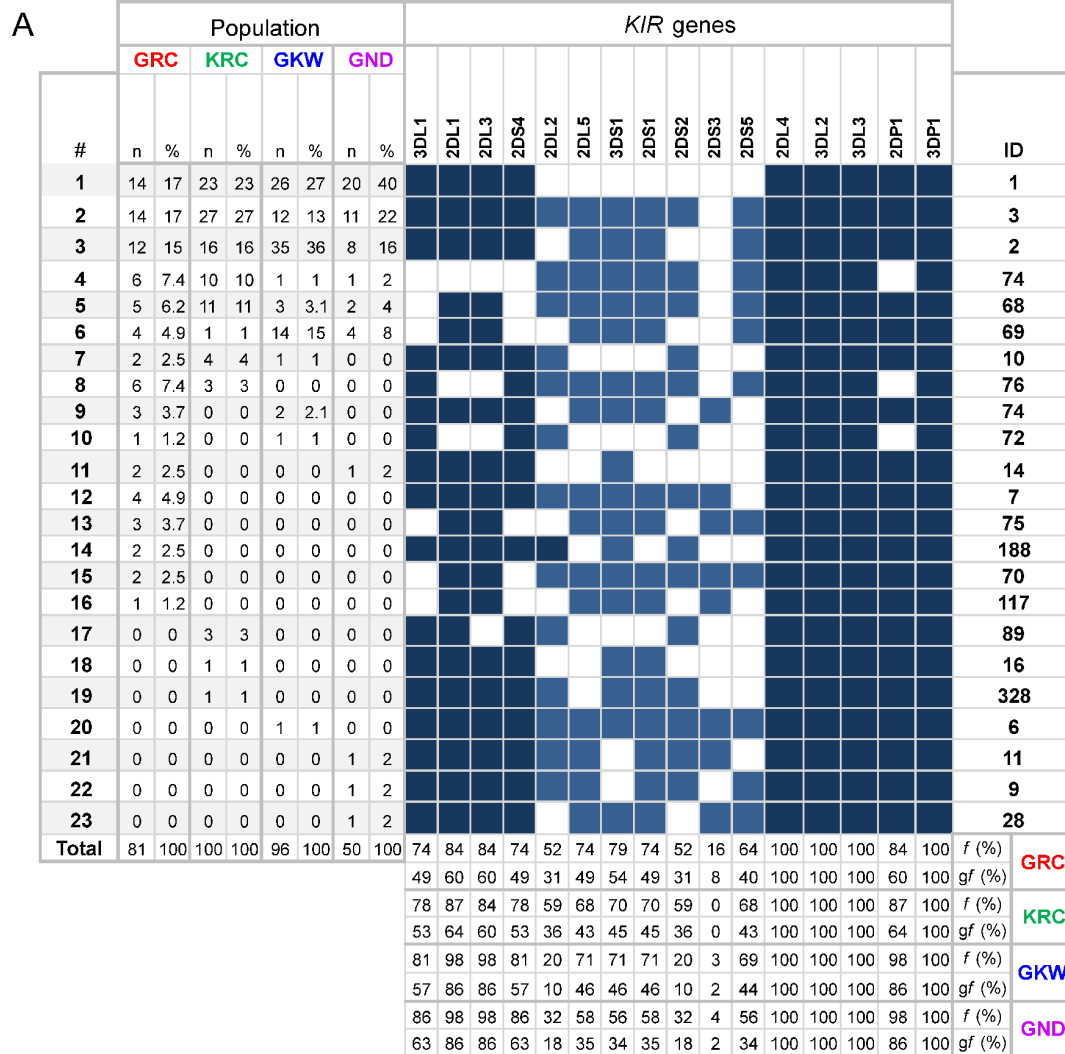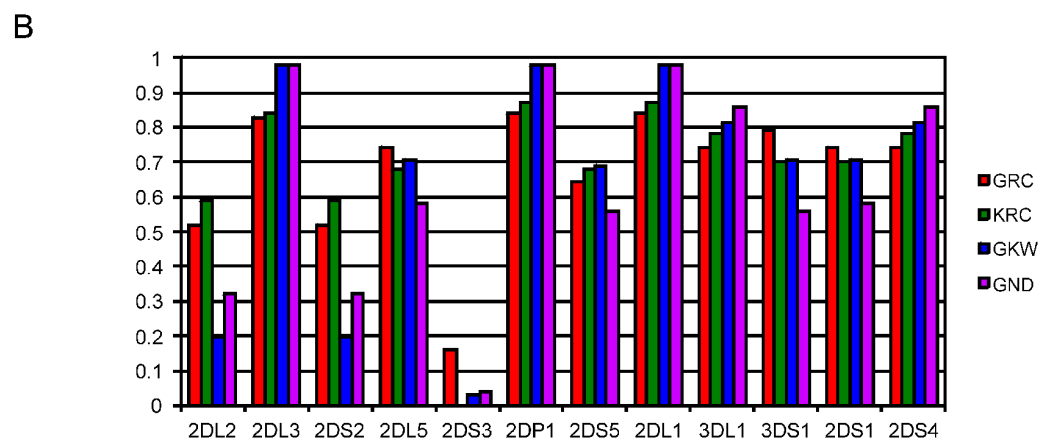

**Figure 1. Frequency of *KIR* profiles and of individual *KIR* genes in the Kaingang and Guarani populations. 1A** – The frequencies of *KIR* profiles are on the left side and the frequencies of individual genes are on the bottom. Filled boxes indicate presence of the gene and blank boxes, absence. In dark blue are genes typically from haplotypes A and light blue, from haplotypes B. *n* = number of individuals; *f* = carrier frequencies; *gf* = gene frequency; ID = identification number according allele frequencies.net [24]. **1B** - Phenotypic frequencies of each *KIR* gene and pseudogene in the Kaingang and the three Guarani populations. Genes observed in all individuals are not shown.  
doi:10.1371/journal.pone.0056755.g001

## Reference

1. Augusto DG, Piovezan BZ, Tsuneto LT, Callegari-Jacques SM, Petzl-Erler ML (2013) *KIR* Gene Content in Amerindians Indicates Influence of Demographic Factors. PLoS ONE 8(2): e56755. doi:10.1371/journal.pone.0056755
